# Psychiatrists Professional Liability Insurance

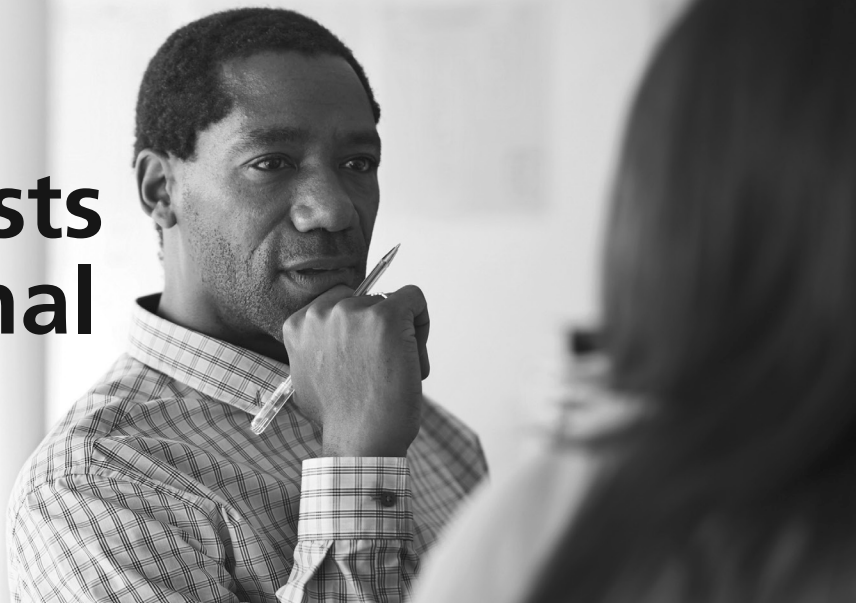

## Discounts Offered Include:

- ✓ **15% NEW POLICYHOLDER DISCOUNT\***  
(must be claims free for the last 6 months)
- ✓ **Up to 50% New Doctor Discount** (for those who qualify)
- ✓ **10% Claims Free Discount** (for those practicing 10 years, after completion of training, and remain claims free)
- ✓ **50% Resident-Fellow Member Discount**
- ✓ **15% Child and Adolescent Psychiatrist Discount** (for those whose patient base is more than 50% children and adolescents)
- ✓ **50% Part-time Discount** (for up to 20 client hours a week or less)
- ✓ **5% Risk Management Discount** (for 3 hours of CME)

*\*Where allowable by law and currently not available in AK or NY.  
(Above Discounts and Coverage Features are subject to individual state approval.)*

**40**  
YEARS

For over 40 years we have provided exceptional protection and have a reputation for outstanding customer service. Our extensive years of experience and industry knowledge allows us to help you by providing worry free coverage so you can concentrate on what you do best – helping people help themselves. When it comes to caring about people, we have a lot in common.

## Our Psychiatrists Professional Liability Program Provides:

- Limits up to \$150,000 in Defense Expenses related to Licensing Board Hearings and other Proceedings
- Up to \$150,000 in Fire Legal Liability Coverage
- Up to \$100,000 in Medical Payments for Bodily Injury
- Up to \$25,000 for First Party Assault and Battery Coverage
- Up to \$25,000 for Information Privacy Coverage (HIPAA)
- Up to \$15,000 in Emergency Aid Coverage
- Insured's Consent to Settle required in the settlement of any claim – No arbitration clause
- Telepsychiatry, ECT, Forensic Psychiatry Coverage
- Risk Management Hotline with 24/7 Service for Emergencies

Visit us at [apamalpractice.com](http://apamalpractice.com) or call **877.740.1777** to learn more.

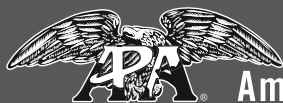

**American Professional Agency**

LEADERS IN PSYCHIATRIC MEDICAL LIABILITY INSURANCE

Endorsed by:

AMERICAN  
PSYCHIATRIC  
ASSOCIATION

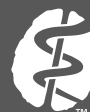

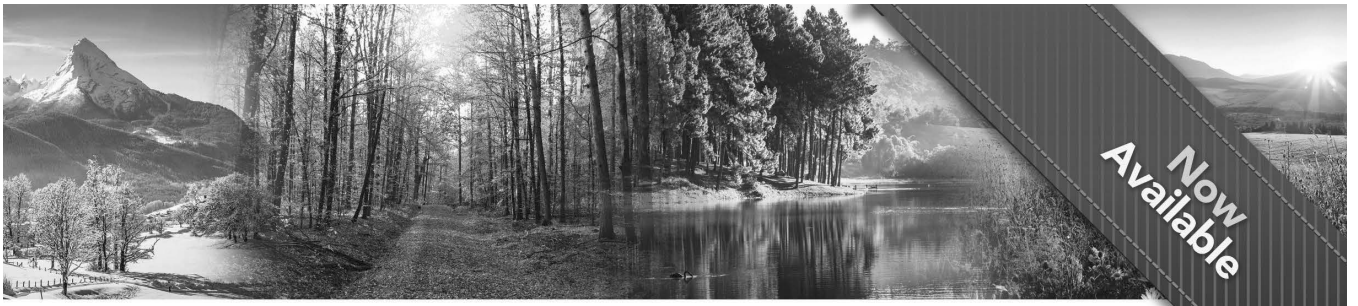

# ORTIZ | PVAT™

ORTIZ PICTURE VOCABULARY  
ACQUISITION TEST™

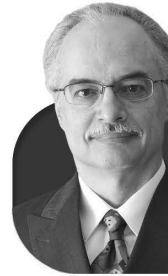

From Author  
Samuel O. Ortiz, Ph.D.

## *Fair – Accurate – Digital*

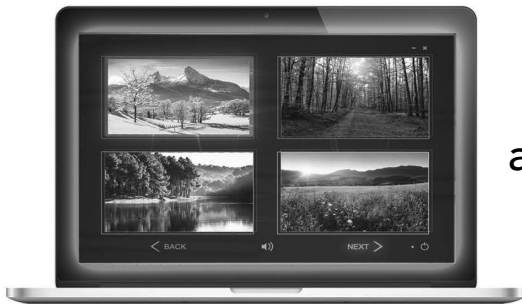

A new fully *digital* test that provides a *fair* and *accurate* assessment of receptive vocabulary ability for both English speakers and English learners

- ⊕ *Easy, visually engaging, and standardized administration*
- ⊕ *Can be used with any child or youth no matter what their first language is*
- ⊕ *User-friendly reports included to make assessment interpretation fast and clear*
- ⊕ *Unique dual norms for both English speakers and English learners*

 **MHS**<sup>®</sup>  
ASSESSMENTS

[MHS.com/OrtizPVAT](http://MHS.com/OrtizPVAT)

# THE AMERICAN PSYCHIATRIC ASSOCIATION

800 Maine Avenue, S.W., Suite 900, Washington, D.C. 20024

(888) 357-7924 (toll-free inside the U.S. and Canada)

web site: [www.psychiatry.org](http://www.psychiatry.org) • e-mail: [apa@psych.org](mailto:apa@psych.org)

## Chairpersons of Councils, Committees, and Task Forces

### Standing Committees

|                             |                             |
|-----------------------------|-----------------------------|
| <b>Bylaws</b>               | Esperanza Diaz, M.D.        |
| <b>Elections</b>            | Joseph A. Cheong, M.D.      |
| <b>Ethics</b>               | Ezra E.H. Griffith, M.D.    |
| <b>Finance and Budget</b>   | Ann Marie T. Sullivan, M.D. |
| <i>Audit</i>                | Gregory W. Dalack, M.D.     |
| <i>Investment Oversight</i> | David Fassler, M.D.         |
| <b>Joint Reference</b>      | Bruce J. Schwartz, M.D.     |
| <b>Membership</b>           | William Arroyo, M.D.        |
| <b>Nominating</b>           | Anita S. Everett, M.D.      |
| <b>Tellers</b>              | Jose P. Vito, M.D.          |

### Non-Standing Committee

|                             |                              |
|-----------------------------|------------------------------|
| <b>Conflict of Interest</b> | Philip R. Muskin, M.D., M.A. |
|-----------------------------|------------------------------|

### Councils

#### Council on Addiction Psychiatry

Andrew J. Saxon, M.D.

#### Council on Advocacy and Government Relations

Patrick S. Runnels, M.D.

*Advocacy and Litigation Funding*

Bhasker J. Dave, M.D.

#### Council on Children, Adolescents, and Their Families

Gabrielle Shapiro, M.D.\*

#### Council on Communications

Carol A. Bernstein, M.D.

#### Council on Consultation-Liaison Psychiatry

David F. Gitlin, M.D.

#### Council on Geriatric Psychiatry

Robert P. Roca, M.D.

#### Council on Healthcare Systems and Financing

Harsh K. Trivedi, M.D.

*Integrated Care*

Ken C. Hopper, M.D.

*Reimbursement for Psychiatric Care*

Laurence H. Miller, M.D.

*RBRVS, Codes and Reimbursement*

Gregory G. Harris, M.D.

*Telepsychiatry*

James H. Shore, M.D.

#### Council on International Psychiatry

Bernardo Ng, M.D.

*Chester Pierce Human Rights Award Committee*

James L. Griffith, M.D.

#### Council on Medical Education and Lifelong Learning

Mark H. Rapaport, M.D.

*Scientific Program*

Jacqueline M. Feldman, M.D.

*Scientific Program—IPS (Oct. to Oct. tenure)*

Glenda L. Wrenn, M.D.

*Vestermark Award Committee*

Lowell D. Tong, M.D.

#### Council on Minority Mental Health and Health Disparities

Christina V. Mangurian, M.D.

#### Council on Psychiatry and Law

Debra A. Pinals, M.D.

*Judicial Action*

Marvin S. Swartz, M.D.

#### Council on Quality Care

Grayson S. Norquist, M.D.

*Mental Health Information Technology*

Brent Nelson, M.D.

*Performance Measures*

Carol Alter, M.D.\*

*Practice Guidelines*

Daniel J. Anzia, M.D.

#### Council on Research

Dwight L. Evans, M.D.

*Psychiatric Dimensions of Disasters*

Joshua C. Morganstein, M.D.

\* Has served in role since conclusion of APA Annual Meeting, May 2018. Previous issues of the *Journal* had not updated the position holder.

# The American Journal of Psychiatry

## Residents' Journal

[ajp.psychiatryonline.org/loi/ajp-rj](http://ajp.psychiatryonline.org/loi/ajp-rj)

### August 2018: Hospice and Palliative Care

- 2 Trainee Education in Hospice and Palliative Care**  
Shapir Rosenberg, M.D.  
*Emphasizing the need for high-quality care for patients with terminal conditions*
- 3 Physician Aid-in-Dying: Practical Considerations**  
Arthi Kumaravel, M.D., M.B.E.  
*Examining current legislation, ethical issues, capacity assessment, and the role of psychiatrists*
- 6 Dignity Therapy**  
Shapir Rosenberg, M.D.  
*Assessing patients' existential and spiritual experiences*
- 8 The Challenges of Palliative and End-of-Life Care in Tertiary Care State Psychiatric Hospitals**  
Yara Moustafa, M.D., Ph.D.  
*Exposing barriers to adequate care*
- 9 Connecting the Dots Between Psychiatry and Palliative Medicine**  
Yujin Lee, M.D., M.S.  
*Exploring individual and family psychodynamics that inform decision making and addressing comorbid psychiatric disorders*
- 10 Keeping One Awake at Night**  
Jennifer Hu, M.D.
- 11 Gleason: A Rebirth**  
Reviewed by Yara Moustafa, M.D., Ph.D.
- 12 Residents' Resources**

**The Residents' Journal** is an e-publication that serves as a forum for sharing ideas and experiences in training, clinical practice, research, and careers.

**The Residents' Journal** considers manuscripts authored by medical students, resident physicians, and fellows. For information about submitting manuscripts, visit the **Author Resources** page online: [ajp.psychiatryonline.org/residents\\_journal/rj\\_ifora](http://ajp.psychiatryonline.org/residents_journal/rj_ifora).

### 2018–2019 Editorial Board

**Editor-in-Chief:** Oliver Glass, M.D.

**Senior Deputy Editor:** Shapir Rosenberg, M.D.

**Deputy Editor:** Matthew Edwards, M.D.

**Deputy Editor:** Anna Kim, M.D.

**Deputy Editor/Podcast Editor:**  
Lindsay Lebin, M.D.

**Associate Editors:** Carol Chan, M.D.  
Alexander Cole, M.D.  
Jason Garner, M.D., J.D.  
David Latov, M.D.  
Elon Richman, M.D.

**Culture Editor:** Erik Bayona, M.D.

**Culture Editor/Social Media Editor:**  
Somya Abubucker, M.D.

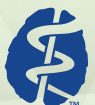

# Subscribe to Psychiatric Services today!

## Don't miss the September issue:

- An RCT on mobile mental health versus clinical care
- Peer work: a systematic review and reporting guidelines for peer studies
- Better treatment engagement with collaborative care for youths
- Personal Accounts: On dignity and psychiatry
- *New column:* Social Determinants of Mental Health

## Coming in the October issue:

- Viewpoint: McCance-Katz on restructuring SAMHSA
- Inpatient vulnerability to medical error and other adverse events
- Increased exercise with weight management programs
- Datapoints on nationwide certification of peer specialists
- Legislators' sources of behavioral health research

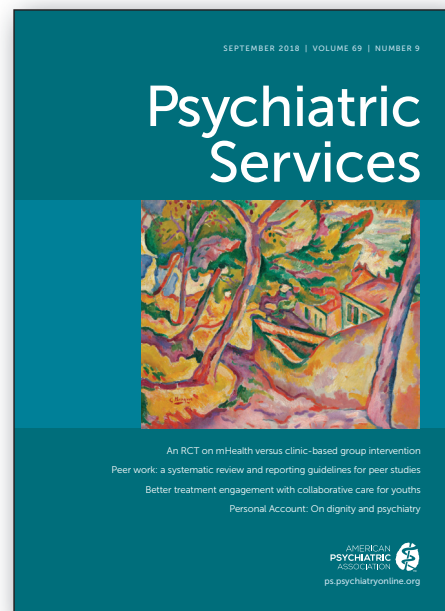

## One low price covers your print and online subscription.

\$ 121 APA Member print and online subscription

\$ 110 APA Member online-only subscription

## Listen to our podcast

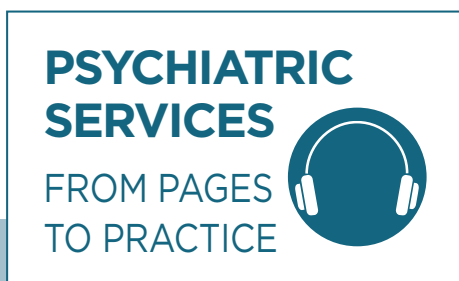

[ps.psychiatryonline.org](http://ps.psychiatryonline.org)

Subscribe today at [www.appi.org](http://www.appi.org) or call  
Customer Service at 1-800-368-5777.

AMERICAN  
PSYCHIATRIC  
ASSOCIATION  
PUBLISHING 

[www.appi.org](http://www.appi.org)

Priority Code AH1801SEP

# Go Online

Visit [ajp.psychiatryonline.org](http://ajp.psychiatryonline.org) for these features!

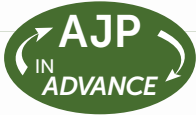

## AJP in Advance

*Discover the latest research advances before they appear in print*

### **Individual Treatment of Posttraumatic Stress Disorder Using Mantram Repetition: A Randomized Clinical Trial**

Considerable interest focuses on the utility of mantram repetition therapy, a novel psychotherapeutic treatment for PTSD. The authors report new results from a randomized control trial comparing this treatment to present-centered therapy in more than 80 patients with PTSD. Results suggest that mantram-based treatment may exert greater effects than the other psychotherapy on symptoms of PTSD.

### **Predicting Suicide Attempts and Suicide Deaths Following Outpatient Visits Using Electronic Health Records**

Advances in computer technology provide unusual opportunities to improve prediction for rare outcomes. The authors use these advances to derive a prediction algorithm for suicide-related behavior by drawing data from both self reported depressive symptoms and health-record information. The algorithm could inform clinicians trying to identify patients at highest risk for suicide-related behavior.

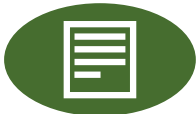

## AJP CME

*Earn CME credit: 3 courses per issue*

This month's courses appear on pages 917–920. Each short course is based on one article in this issue and can earn up to 1 *AMA PRA Category 1 Credit*<sup>™</sup>. CME credit is issued only **online**, and a paid subscription to AJP's CME course program is required.

Visit [psychiatryonline.org/cme](http://psychiatryonline.org/cme) and click on the "American Journal of Psychiatry" tab.

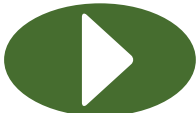

## AJP Multimedia

*Access Audio or Video for highlights of each issue*

In AJP Audio this month, host Ann Thomas talks with Betsy D. Kennard, Psy.D., about her study on an inpatient intervention and smartphone app to reduce adolescent suicide attempts following hospital discharge. Executive Editor Michael Roy reviews research on caring for patients with nonepileptic seizures, how sudden parental death affects depression in children, the relationship between abortion and suicidal ideation, and computerized CBT for addiction treatment.

In this month's video, Deputy Editor Daniel S. Pine, M.D., discusses the articles "Randomized Clinical Trial of Computerized and Clinician-Delivered CBT in Comparison With Standard Outpatient Treatment for Substance Use Disorders: Primary Within-Treatment and Follow-Up Outcomes" and "Clinical Implementation of Pharmacogenetic Decision Support Tools for Antidepressant Drug Prescribing."

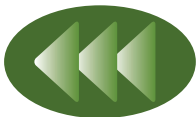

## History of Psychiatry

*Revisit the field's rich history through the pages of AJP*

### **50 Years Ago this Month: Psychosocial Factors in Riots—Old and New**

John P. Spiegel writes that we have been more willing to settle for violence than to attend to the social conflicts that generate it. A first step toward dealing with the underlying problem would be acknowledging its existence, then approach its solution through attempts to share power with previously excluded groups.

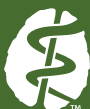

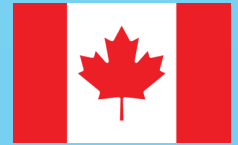

## BRITISH COLUMBIA, CANADA

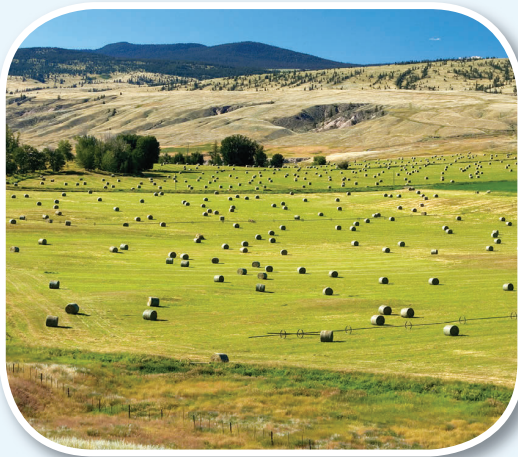

### WILLIAMS LAKE

Adult Psychiatrist - Fantastic opportunity to work in a welcoming rural community setting with terrific lifestyle opportunities! This is a new position so you can tailor your practice to your specific interests. Your income would be primarily fee for service. Some sessions are available. And no overhead! Your office will be in the mental health facility which is managed by Interior Health. Your team includes social workers, therapists and outreach nurses.

### CRANBROOK

Two opportunities for general Psychiatrists to join the expanding team at East Kootenay Regional Hospital. In this position you will work with our tertiary, secondary acute, and full spectrum of community mental health & substance use services to provide comprehensive, quality client centred consultative and on call services to individuals and their families in EKH's 10 bed inpatient unit, as well as consults to the medical/surgical units and the emergency department.

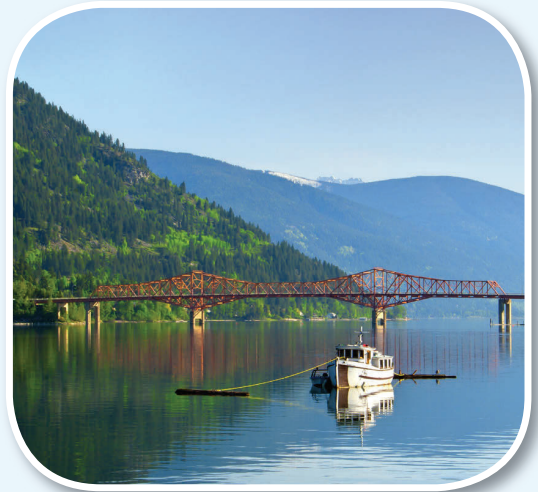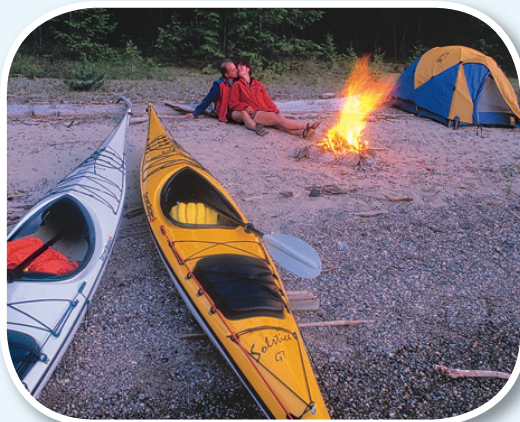

### TRAIL

Opportunities for both General Adult Psychiatrists and Child and Adolescent Psychiatrists are available. You will be part of our team of Psychiatrists providing service to KBRH's 12 bed general adult inpatient unit, consults to the medical/surgical units and the emergency department, as well as maintaining a community based practice.

For more information & to apply contact:  
[Jennifer.Hiebert@InteriorHealth.ca](mailto:Jennifer.Hiebert@InteriorHealth.ca)

[www.betterhere.ca](http://www.betterhere.ca)

Inspiring better health, Inspiring a better you, it's better here
