JUST PUBLISHED!

## Competency in Combining Pharmacotherapy and Psychotherapy Integrated and Split Treatment, Second Edition

### Core Competencies in Psychotherapy

Michelle B. Riba, M.D., M.S., Richard Balon, M.D.,  
and Laura Weiss Roberts, M.D., M.A.

Series Editor: Glen O. Gabbard, M.D.

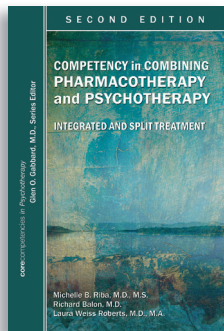

This book is designed to help psychiatrists at any stage of their career achieve competency in combining and coordinating pharmacotherapeutic and psychotherapeutic treatments for the benefit of their patients.

This second edition, addresses both integrated (single clinician) and split/collaborative (multiple clinicians) treatments, discussing for each:

- The selection of medication and psychotherapy
- The patient evaluation and opening
- Sequencing
- Evaluating, monitoring, and supervising treatment
- Terminating and transitioning patient care

The book also offers a chapter—new to this second edition—that focuses on primary care access for mental health services in the context of integrated and split/collaborative care.

2018 • 175 pages • ISBN 978-1-61537-066-5 • Paperback • \$65.00 • Item #37066

2018 • 175 pages • ISBN 978-1-61537-180-8 • eBook • \$52.00 • Item #37180

**20% Discount for American Psychiatric Association Members**

**25% Discount for APA Resident-Fellow Members**

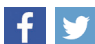

AMERICAN  
PSYCHIATRIC  
ASSOCIATION  
PUBLISHING

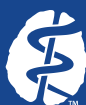

Order @ [www.appi.org](http://www.appi.org)

Email: [appi@psych.org](mailto:appi@psych.org)

Phone: 1-800-368-5777

Priority Code AH1805A

# Psychiatrists

## MINNESOTA

HealthPartners is one of the Upper Midwest's leading multispecialty physician groups. We have practice opportunities for talented, caring BC/BE psychiatrists in metropolitan Minneapolis/St. Paul and central Minnesota.

### Inpatient/Adult

- **Regions Hospital (St. Paul, MN)**

Our state-of-the-art inpatient psychiatric facilities allow our team of psychiatrists, residents, therapists, social workers, NPs/PAs and nursing staff to provide exceptional care to adult psychiatric inpatients. Our Regions care model schedule is 7 days on/7 days off.

### Outpatient/Adult

- **Central Minnesota (Sartell/St. Cloud)**

- **Metropolitan Minneapolis/St. Paul**

These teams provide integrated outpatient mental health services in our primary care and outpatient specialty clinics located within a variety of urban, suburban and semi-rural communities. Full-time or part-time practices are available. No hospital call responsibilities.

In addition to competitive salaries, HealthPartners offers an excellent benefits package, including an employer-matched 401(k) and 457(b), generous personal time off, malpractice insurance coverage, and more.

---

Let us tell you more! Please forward your CV and cover letter to:  
**[lori.m.fake@healthpartners.com](mailto:lori.m.fake@healthpartners.com)**, apply online at **[healthpartners.com/careers](http://healthpartners.com/careers)**, or call 800-472-4695 x1. EOE

---

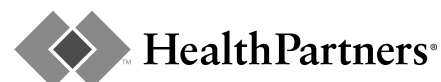

## Subscription and Business Information

*The American Journal of Psychiatry*, ISSN 0002-953X, is published monthly by the American Psychiatric Association.

The American Psychiatric Association does not hold itself responsible for statements made in its publications by contributors or advertisers. Unless so stated, material in *The American Journal of Psychiatry* does not reflect the endorsement, official attitude, or position of the American Psychiatric Association or of the Journal's Editorial Board.

Periodicals postage paid at Washington, DC, and additional mailing offices. POSTMASTER: Send address changes to *The American Journal of Psychiatry*, Circulation Department, American Psychiatric Association, 800 Maine Avenue, S.W., Suite 900, Washington, D.C. 20024.

### Editorial Office

*American Journal of Psychiatry*  
American Psychiatric Association  
800 Maine Avenue, S.W., Suite 900  
Washington, D.C. 20024  
E-mail: [ajp@psych.org](mailto:ajp@psych.org)

### Customer Service

Phone: (800) 368-5777 (toll-free)  
E-mail: [appi@psych.org](mailto:appi@psych.org)

### APA Member Subscription Services

Phone: (888) 35-PSYCH (toll-free)

### Subscriptions

Per year: individual \$333.00,  
international \$500.00

Institutional subscriptions are tier priced. For institutional site license or pricing information, contact (202) 559-3729 or [institutions@psych.org](mailto:institutions@psych.org).

*Additional subscription options, including single issues and student rates*

Contact Customer Service

### Advertising

*Pharmaceutical Print and Online Advertising*  
Frank Cox, Kathleen Harrison, Tim Wolfinger  
Pharmaceutical Media, Inc.  
30 East 33rd Street  
New York, NY 10016  
Phone: (212) 904-0379  
E-mail: [twolfinger@pminy.com](mailto:twolfinger@pminy.com)

### *Nonpharmaceutical and Online Sales*

Eamon Wood  
Pharmaceutical Media, Inc.  
E-mail: [ewood@pminy.com](mailto:ewood@pminy.com)  
(see address and phone above).

### Permissions and Reprints

Material published in the journals of the American Psychiatric Association and American Psychiatric Association Publishing is protected by copyright and all rights are reserved. Material may not be reproduced in any form or by any means without written permission from the copyright owner. For permission to reproduce material published by APA, please visit <http://www.appi.org/customer-service/permissions> for more information. Permission can also be secured through the Copyright Clearance Center ([www.copyright.com](http://www.copyright.com)).

APA does not require that permission be obtained for the photocopying of isolated articles for nonprofit classroom or library reserve use; all fees associated with such permission are waived. This consent does not extend to other kinds of copying, such as copying for general distribution, for advertising or promotional purposes, for creating new collective works, or for resale. Requests for commercial distribution should be directed to (202) 609-7075.

For bulk reprints, please contact Jane Cha, (202) 609-7075; e-mail: [jcha@psych.org](mailto:jcha@psych.org).

Indexed in Abstracts for Social Workers, Academic Abstracts, Biological Abstracts, Chemical Abstracts, Chicago Psychoanalytic Literature Index, Cumulative Index to Nursing Literature, Excerpta Medica, Hospital Literature Index, Index Medicus, International Nursing Index, Nutrition Abstracts, Psychological Abstracts, Science Citation Index, Social Science Source, and Social Sciences Index.

Pages are produced by Sheridan Journal Services (Waterbury, VT) and printed by Sheridan NH (Hanover, NH) on acid-free paper effective with Volume 169, Number 1, January 2012.

© 2018 American Psychiatric Association.

## ACOS Behavioral Health VA Pittsburgh Healthcare System

VA Pittsburgh Healthcare System (VAPHS) seeks a proven clinical leader in behavioral health to serve as its Associate Chief of Staff (ACOS) for Behavioral Health. The Behavioral Health ACOS serves a major leadership role within VAPHS, with responsibility for oversight of the quality and programmatic development of behavioral health clinical care, investigation and education, to include training medical students, residents and other trainees. The position offers extensive opportunities to foster and participate in collaborative initiatives between VAPHS and its academic affiliates to advance clinical care of Veterans with behavioral health disorders. Joint appointment at the University of Pittsburgh is available and desirable. The successful candidate has an established track record as a clinical leader in behavioral health and experience in medical education and research. The position is open to physicians and psychologists with expertise in all three of those areas.

VAPHS is a 1A high complexity, tertiary-care Department of Veterans Affairs' facility composed of two main medical campuses, five outpatient clinics and three Veterans Outreach Centers. It provides 152,000 enrolled Veterans in Pennsylvania, Ohio and West Virginia with a full range of patient-care services in medicine, surgery, psychiatry, physical medicine and rehabilitation, neurology, oncology, dentistry, geriatrics and extended care. Its Behavioral Health service line is staffed by over 100 behavioral health providers, operates a 78-bed inpatient behavioral health facility and conducts over 100,000 outpatient visits annually.

Address inquiries about the position to Steven Graham M.D., PhD (steven.graham@va.gov), Chairperson, Search Committee. Vacancy announcements are posted on USAJobs – <https://www.usajobs.gov/>.

VAPHS is an Equal Opportunity Employer.

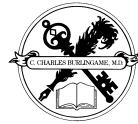

## Call for Nominations

The Institute of Living/Hartford Hospital is pleased to announce that nominations are now being accepted for the 2019 C. Charles Burlingame Award. This award, honoring an outstanding leader in psychiatric education, research or administration, is made in the memory of Dr. Burlingame, psychiatrist-in-chief from 1931 to 1950.

We invite you to nominate a person who has significantly advanced the field of psychiatry. The nomination must include a current curriculum vitae and two letters of support describing the candidate's achievements.

The Institute of Living is a comprehensive behavioral health system for the evaluation and treatment of psychiatric and addiction disorders. We offer a full continuum of services to patients and remain committed to the highest standards of clinical care, research and education.

### Past Recipients

|                                       |                                   |
|---------------------------------------|-----------------------------------|
| 1988 Robert Kellner, M.D., Ph.D.      | 2004 David H. Barlow, Ph.D.       |
| 1989 William T. Carpenter, Jr., M.D.  | 2005 Herbert D. Kleber, M.D.      |
| 1990 Dennis P. Cantwell, M.D.         | 2006 Daniel N. Stern, M.D.        |
| 1991 George E. Vaillant, M.D.         | 2007 Jerrold F. Rosenbaum, M.D.   |
| 1992 A. John Rush, M.D.               | 2008 K. Ranga Rama Krishnan, M.D. |
| 1993 John C. Nemiah, M.D.             | 2009 David J. Kupfer, M.D.        |
| 1994 Maurice J. Martin, M.D.          | 2010 Professor Sir Michael Rutter |
| 1995 Otto F. Kernberg, M.D.           | 2011 Jeffrey A. Lieberman, M.D.   |
| 1996 Charles P. O'Brien, M.D., Ph.D.  | 2012 Judith L. Rapoport, M.D.     |
| 1997 Glen Owen Gabbard, M.D.          | 2013 Nora D. Volkow, M.D.         |
| 1998 Lissy F. Jarvik, M.D., Ph.D.     | 2014 Daniel R. Weinberger, M.D.   |
| 1999 Nancy C. Andreasen, M.D., Ph.D.  | 2015 David A. Brent, M.D.         |
| 2000 Lewis L. Judd, M.D.              | 2016 Steven S. Sharfstein, M.D.   |
| 2001 Paul S. Appelbaum, M.D.          | 2017 Harold Alan Pincus, M.D.     |
| 2002 Charles B. Nemeroff, M.D., Ph.D. | 2018 Kenneth S. Kendler, M.D.     |
| 2003 Dilip V. Jeste, M.D.             |                                   |

Institute  
of Living

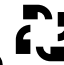

A Division of Hartford Hospital

Nominations should be sent no later than December 5, 2018 to:  
Harold I. Schwartz, M.D.  
HHC Regional VP, Behavioral Health  
Psychiatrist-in-Chief  
The Institute of Living/Hartford Hospital  
200 Retreat Ave., Hartford, CT 06106  
or e-mailed to  
Kathleen.Day@hhchealth.org

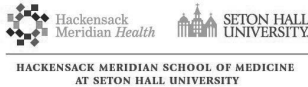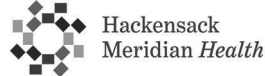

## Department of Psychiatry

*With the continued growth of our Department of Psychiatry and our New General Psychiatry Residency Programs at Ocean Medical Center and Jersey Shore University Medical Center our vision for Behavioral Health is Bright.*

**Hackensack Meridian Health** is a leading not-for-profit health care network in New Jersey offering a complete range of medical services, innovative research, and life enhancing care aiming to serve as a national model for changing and simplifying health care delivery through partnerships with innovative companies and focusing on quality and safety.

Through a partnership between Hackensack Meridian Health and Seton Hall University, the School of Medicine will re-define graduate medical education, research, and clinical practice; reverse the critical physician shortage in both the New York/New Jersey metropolitan area and the nation; and stimulate economic development in northern New Jersey.

The School of Medicine will be the anchor in the development of a comprehensive health sciences campus that will also include research facilities and biotechnology endeavors – all in service of educating tomorrow's doctors, discovering novel therapies, and facilitating compassionate and effective healthcare that will meet the ever-changing needs of tomorrow's patients.

The School of Medicine will be the cornerstone of a dynamic venue for the exchange of ideas, the development of healthcare and research thought leaders and practitioners, and the discovery of novel therapies to meet the medical challenges of the future.

"Ocean Medical Center's psychiatry program will be a community-based program," said Ramon Solkhah, M.D., program director for psychiatry as well as founding Chair of Psychiatry & Behavioral Health at the Hackensack Meridian School of Medicine at Seton Hall University. "Our new psychiatry residency program will improve clinical care and ultimately encourage future health care leaders to build practices in the Jersey Shore area."

As the area's premier provider of psychiatric services, **Hackensack Meridian Behavioral Health Services** has provided comprehensive mental health and substance abuse services to the residents of Monmouth, Ocean, Middlesex, and Bergen Counties for over forty years. Due to continued growth and expansion, we are currently accepting applications for Psychiatrists to join our Mental Health and Addiction Interdisciplinary Teams in the following positions:

- **Consultation Liaison Psychiatrists:** Jersey Shore University Medical Center (Neptune, NJ) and Riverview Medical Center (Red Bank, NJ) And Hackensack University Medical Center (Hackensack, NJ)
- **Staff Psychiatrist for Adult Inpatient Unit:** Jersey Shore University Medical Center (Neptune, NJ) and Riverview Medical Center (Red Bank, NJ) and Hackensack University Medical Center (Hackensack, NJ)
- **Outpatient Child & Adolescent Psychiatrist:** Jersey Shore University Medical Center (Neptune, NJ) and Hackensack University Medical Center (Hackensack, NJ)
- **Medical Director/Section Chief, Child & Adolescent Psychiatry:** Jersey Shore University Medical Center (Neptune, NJ)
- **Outpatient General Psychiatrist:** Jersey Shore University Medical Center (Neptune, NJ), Riverview Medical Center (Red Bank, NJ), and Raritan Bay Medical Center (Perth Amboy, NJ)
- **Medical Director of Adult Inpatient Unit Riverview (Red Bank, NJ)**
- **Emergency Psychiatry:** Raritan Bay Medical Center (Perth Amboy, NJ)
- **Addiction Psychiatrist – Hackensack University Medical Center (Hackensack, NJ)**
- **Geriatric Psychiatry – Hackensack University Medical Center (Hackensack, NJ)**
- **Outpatient/Consultation Liaison Psychiatrist – JFK (Edison, NJ)**

In addition to our collegial work environment, we offer a highly competitive compensation package which includes: medical/dental plans, 403(b) retirement plan, and relocation assistance.

**For immediate consideration, please contact Renee Theobald, at: [Renee.Theobald@hackensackmeridian.org](mailto:Renee.Theobald@hackensackmeridian.org) or call: 732 751-3597**

#1 TMS CHOICE OF DOCTORS

DO YOU WANT  
INNOVATION

OR

IMITATION?

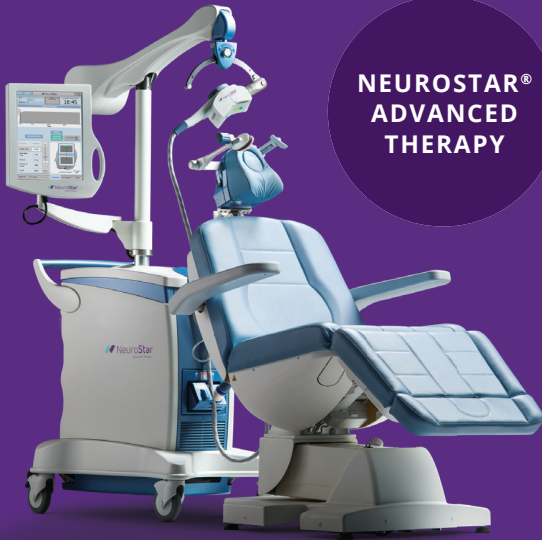

NEUROSTAR®  
ADVANCED  
THERAPY

BASIC  
TMS  
SYSTEMS

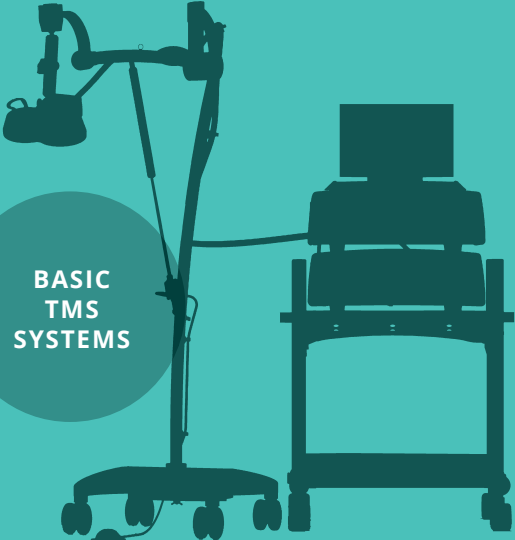

|     |                                                                           |    |
|-----|---------------------------------------------------------------------------|----|
| YES | #1 TMS CHOICE OF DOCTORS                                                  | NO |
| YES | 3D POSITIONING <i>ensures precise coil placement</i>                      | NO |
| YES | CONTACT SENSING <i>continuously monitors patient contact</i>              | NO |
| YES | REAL-TIME FEEDBACK <i>relays treatment info and alerts to technicians</i> | NO |
| YES | MT ASSIST® <i>guides MT location and determines treatment dose</i>        | NO |

Unlike NeuroStar Advanced Therapy, basic TMS systems don't come close to providing the precision technology you need to help transform patients' lives.

**INDICATION**

NeuroStar® is indicated for the treatment of Major Depressive Disorder in adult patients who have failed to receive satisfactory improvement from prior antidepressant medication in the current episode.

**IMPORTANT INFORMATION**

The most common side effect is pain or discomfort at or near the treatment site. These events are transient; they occur during the TMS treatment course and do not

occur for most patients after the first week of treatment. NeuroStar Advanced Therapy should not be used with patients who have non-removable conductive metal in or near the head.

NeuroStar Advanced Therapy is available by prescription only. Please visit [NeuroStar.com](http://NeuroStar.com) for full safety and prescribing information.

**NeuroStar.com | 1-877-600-7555**

©2018 Neuronetics, Inc. 53-51466-000 Rev A

**RIGHT DOSE.  
RIGHT LOCATION.  
EVERY TIME.**

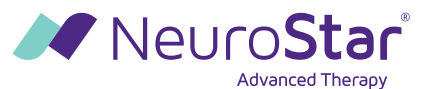

Source: https://psychiatryonline.org/doi/suppl/10.1176/ajp.2018.175.issue-9/suppl_file/back.pdf
