# The American Journal of Psychiatry

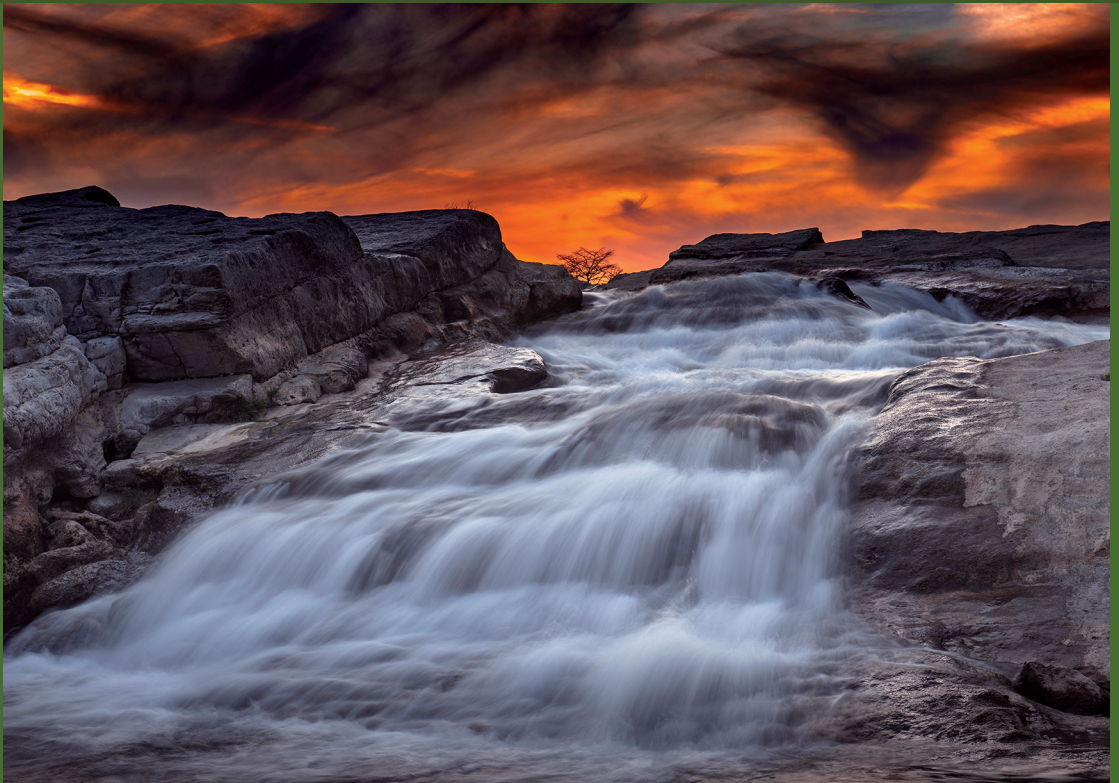

All for One and One for All: Mental Disorders in One Dimension

Five-Year Suicidal Ideation Trajectories Among Women  
Receiving or Being Denied an Abortion

As Safe as Possible (ASAP): A Brief App-Supported Inpatient Intervention to  
Prevent Postdischarge Suicidal Behavior in Hospitalized, Suicidal Adolescents

Clinical Implementation of Pharmacogenetic Decision  
Support Tools for Antidepressant Drug Prescribing
